# Supplementary material for: Total and Differential Somatic Cell Count in Italian Local Cattle Breeds: Phenotypic Variability and Effect on Milk Yield and Composition
Source: MDPI journal article supplement (doi:10.3390/ani13071249), 2023-04-04
Supplement: s1 [file s1]

## SUPPLEMENTARY MATERIALS

# Total and Differential Somatic Cell Count in Italian Local Cattle Breeds: Phenotypic Variability and Effect on Milk Yield and Composition

Silvia Magro <sup>1,\*</sup>, Angela Costa <sup>2</sup> and Massimo De Marchi <sup>1</sup>

<sup>1</sup> Department of Agronomy, Food, Natural Resources, Animals and Environment, University of Padova, 35020 Padova, Italy; massimo.demarchi@unipd.it

<sup>2</sup> Department of Veterinary Medical Sciences, Alma Mater Studiorum University of Bologna, 40064 Bologna, Italy; angela.costa2@unibo.it

\* Correspondence: silvia.magro.1@phd.unipd.it

**Table S1.** F-values and significance<sup>1</sup> of fixed effects in [Eq. 1] for the udder health traits<sup>2</sup> recorded in milk of Alpine Grey and Burlina cows.

| Trait | Breed   | Lactation stage | Parity    | Season    | Day of analysis | Lactation stage x breed | Parity x breed | Season x breed |
|-------|---------|-----------------|-----------|-----------|-----------------|-------------------------|----------------|----------------|
| SCS   | ns      | 66.84 ***       | 22.76 *** | 9.74 ***  | 3.69 **         | ns                      | 5.55 ***       | ns             |
| DSCC  | 9.16 ** | 7.37 ***        | 6.75 ***  | 14.90 *** | 4.86 ***        | 2.29 *                  | 2.83 *         | ns             |
| DSCS  | ns      | 59.58 ***       | 20.83 *** | 8.53 ***  | 3.93 **         | ns                      | 5.54 ***       | ns             |

<sup>1</sup>\*\*\* $P < 0.001$ ; \*\* $P < 0.01$ ; \* $P < 0.05$ ; ns = not significant.

<sup>2</sup>SCS, somatic cell score; DSCC, combined proportion (%) of polymorphonuclear neutrophils and lymphocytes out of the total somatic cell count (cells/ml); DSCS, log<sub>2</sub>-transformed combined number of polymorphonuclear neutrophils and lymphocytes in milk (cells/mL).

**Table S2.** F-values and significance<sup>1</sup> of fixed effects in [Eq. 2] for the milk traits<sup>2</sup> recorded in Alpine Grey and Burlina cows.

| Trait            | Breed     | Lactation stage | Parity    | Season    | Udder health group | Day of analysis | Lactation stage x breed | Parity x breed | Season x breed | Udder health group x breed |
|------------------|-----------|-----------------|-----------|-----------|--------------------|-----------------|-------------------------|----------------|----------------|----------------------------|
| Milk yield, kg/d | 4.22 *    | 398.28 ***      | 39.27 *** | 4.22 ***  | 45.98 ***          | ns              | 3.11 **                 | ns             | 38.69 ***      | ns                         |
| Fat, %           | 14.80 *** | 54.27 ***       | 7.63***   | 6.17 ***  | 9.55 ***           | 9.59 ***        | 2.33 *                  | ns             | 4.02 **        | ns                         |
| Protein, %       | ns        | 375.20 ***      | 2.45 *    | 68.65 *** | 23.00 ***          | 2.61 *          | 3.35 **                 | ns             | 7.59 ***       | 2.19 †                     |
| Casein, %        | ns        | 420.04 ***      | ns        | 89.01 *** | 11.06 ***          | 3.28 **         | 3.67 **                 | ns             | 5.54 ***       | 3.45 *                     |
| Casein index     | ns        | 46.71 ***       | 4.07 ***  | 41.68 **  | 47.20 ***          | 12.11 **        | ns                      | ns             | 3.92 ***       | 2.18 †                     |
| Lactose, %       | 60.43 *** | 40.86 ***       | 46.66 *** | 62.83 *** | 98.98 ***          | 7.61 ***        | 2.44 *                  | 2.66 *         | 15.67 ***      | ns                         |
| BHB              | 59.84 *** | 12.55 ***       | 4.27 **   | 15.77 *** | 19.21 ***          | 7.30 ***        | 4.15 ***                | ns             | 7.60 ***       | 2.31 †                     |
| Urea, mg/dL      | ns        | 420.03 ***      | ns        | 89.01 *** | 11.06 ***          | 3.27 **         | 3.67 **                 | ns             | 5.54 **        | 3.45 *                     |

<sup>1</sup>\*\*\* $P < 0.001$ ; \*\* $P < 0.01$ ; \* $P < 0.05$ ; † $P < 0.10$ ; ns = not significant.

<sup>2</sup>BHB, log<sub>10</sub>-transformed beta-hydroxybutyrate concentration (mmol/L).
